# Supplementary material
Source: Springer Nature journal article supplement (https://www.springermedizin.de/resource/supplementary/12885_2011_2888_MOESM4_ESM.pdf/9462234)

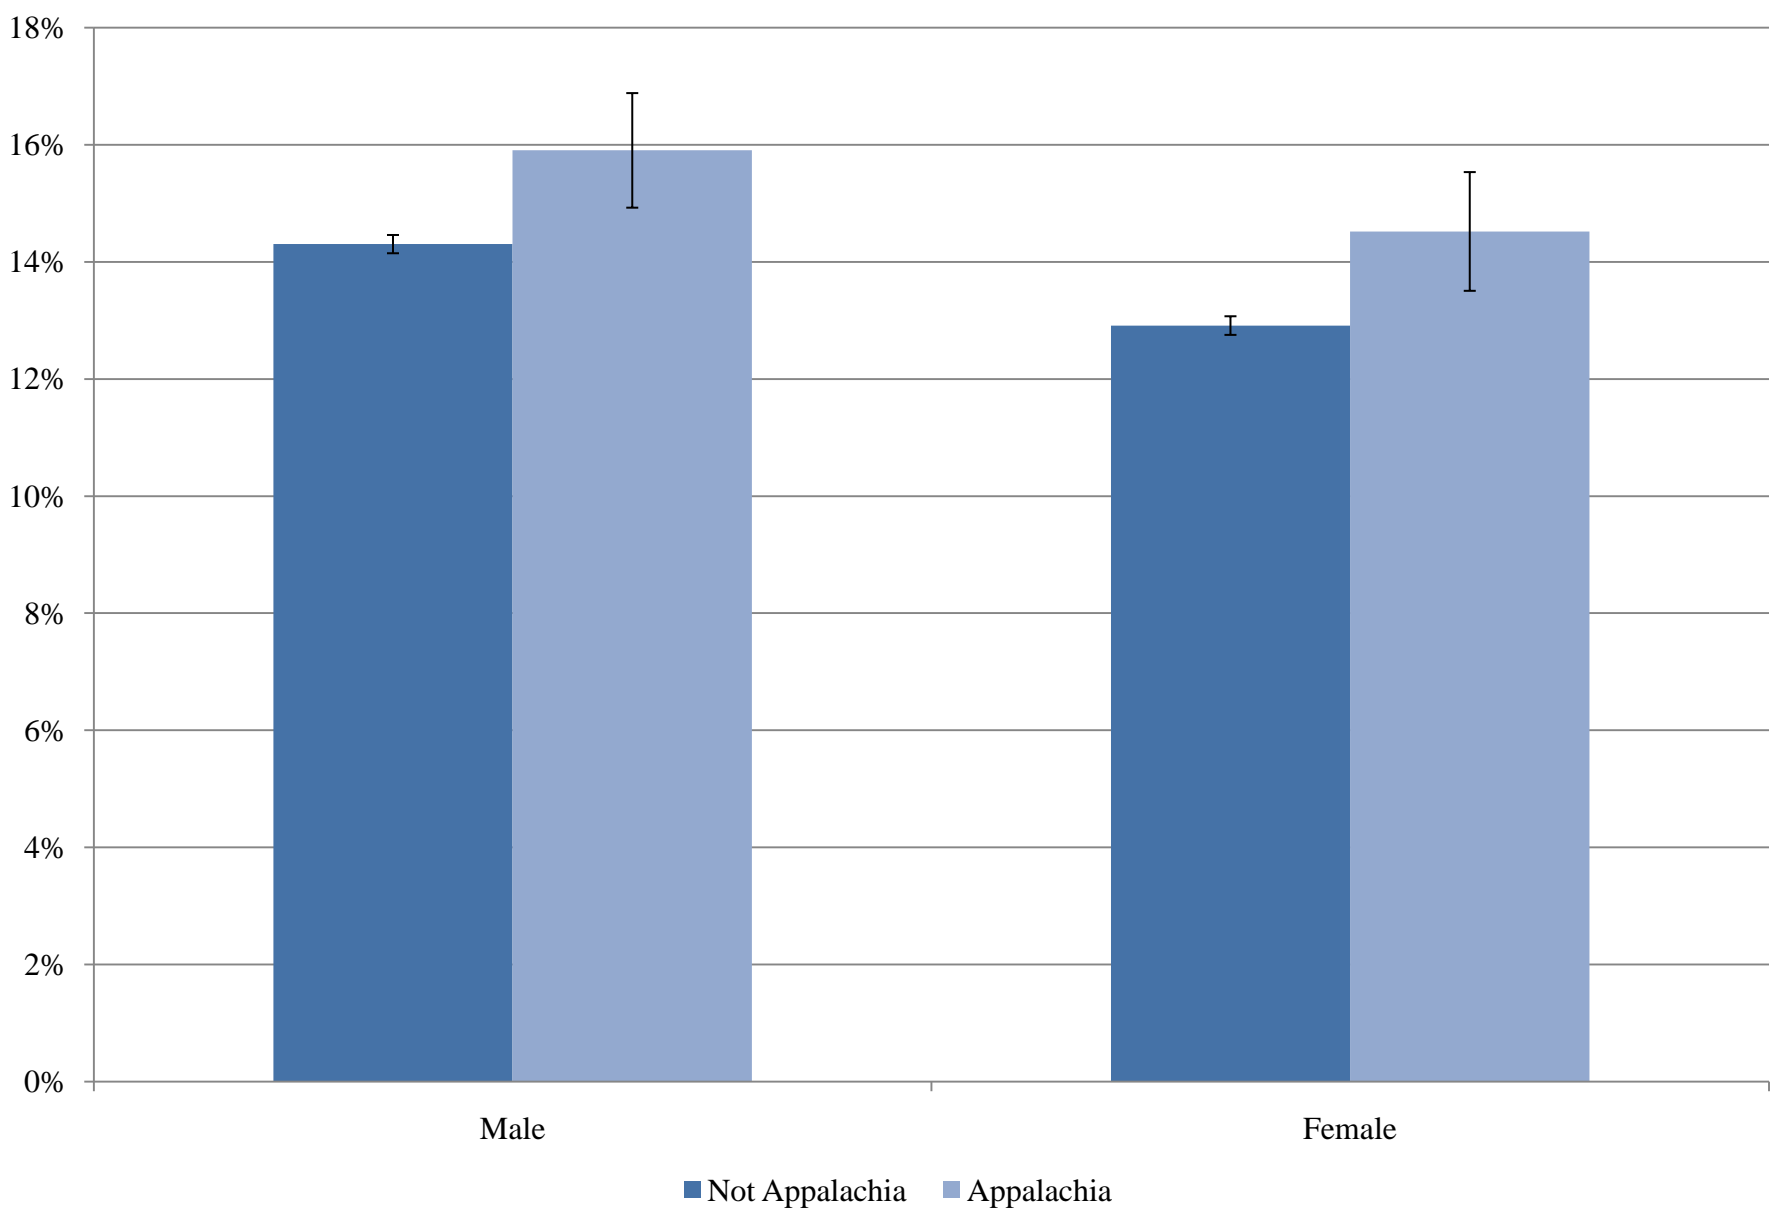

Male

Female

■ Not Appalachia ■ Appalachia

Supplement: MOESM4 [file 9462234]
